# Supplementary material for: Azoxymethane-Induced Colorectal Cancer Mice Treated with a Polyphenol-Rich Apple Extract Show Less Neoplastic Lesions and Signs of Cachexia
Source: MDPI journal article supplement (doi:10.3390/foods10040863), 2021-04-15
Supplement: s1 [file s1]

## Supplementary material

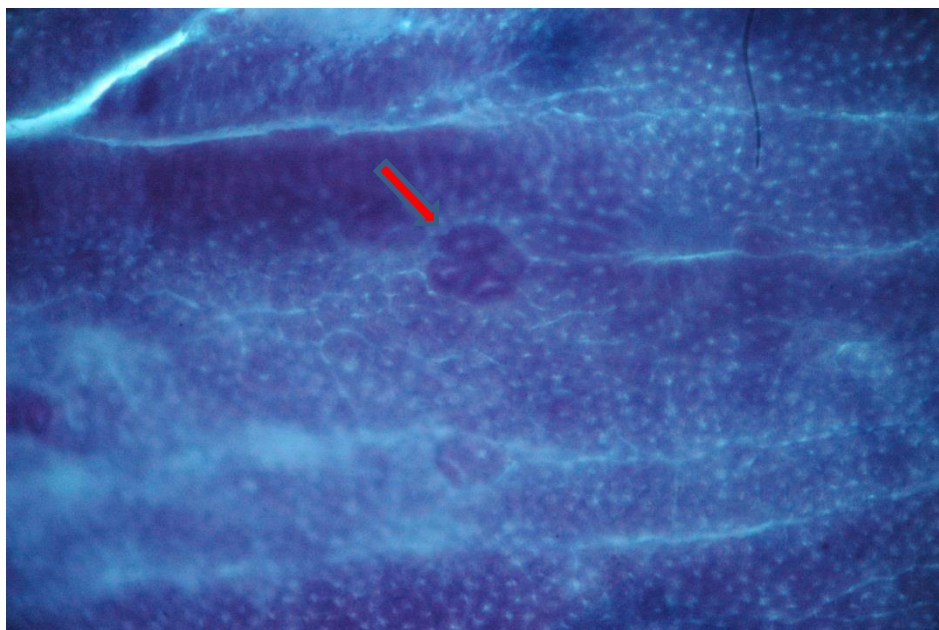

Figure S1. Topographical view of ACF. The colons were opened, stained with methylene blue solution and observed on a glass slide by transillumination in an optic microscope (Olympus). Increased size, bright blue staining and flat appearance hidden in the surrounding mucosa were used as criteria to identify ACF (arrow). Original magnification: 10 $\times$ .
